# Supplementary material
Source: Springer Nature journal article supplement (https://www.springermedizin.de/resource/supplementary/12939_2010_208_MOESM4_ESM.pdf/9550598)

Lorenzcurve: physical health of men

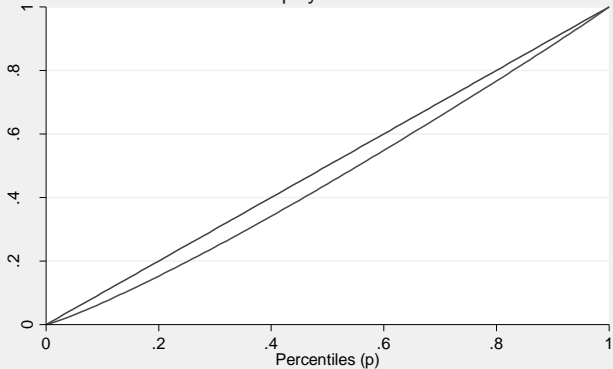

— line\_45° — physical06

Supplement: MOESM4 [file 9550598]
